# Supplementary material for: Rodent-borne infections in rural Ghanaian farming communities
Source: PubMed Central journal article supplement (PMC6481813; doi:10.1371/journal.pone.0215224), 2019-04-24

Date: \_\_\_/\_\_\_/\_\_\_

1. Case ID No.:

2. \_\_\_\_\_  
Village                      GPS Coordinates                      Region

**Demographics**

3. Name of Participant: \_\_\_\_\_ 4. Date of Birth: \_\_\_/\_\_\_/\_\_\_ Age: \_\_\_\_\_ years

5. Sex: Female      Male

6. Residence      Wall Type:  Mud  Block  Other \_\_\_\_\_      Roof:  Aluminum  Straw  Other \_\_\_\_\_  
Do you have:    Indoor plumbing?  Yes  No                      Electricity?  Yes  No

7. Number of persons living in your house: \_\_\_\_\_

8. Where is food stored?  Separate building  Kitchen  Room in house  Other \_\_\_\_\_

9. Occupation:  Business       Farmer (Circle all applicable: Rice    Maize    Livestock other \_\_\_\_\_)  
 Other (List) \_\_\_\_\_

10. Does your family own any of the following?

|                                 |                                   |                                      |                                       |
|---------------------------------|-----------------------------------|--------------------------------------|---------------------------------------|
| <input type="checkbox"/> None   | <input type="checkbox"/> Swine    | <input type="checkbox"/> Pigeons     | <input type="checkbox"/> Dogs         |
| <input type="checkbox"/> Sheep  | <input type="checkbox"/> Donkeys  | <input type="checkbox"/> Ducks       | <input type="checkbox"/> Bats         |
| <input type="checkbox"/> Goats  | <input type="checkbox"/> Horses   | <input type="checkbox"/> Other Birds | <input type="checkbox"/> Grasscutters |
| <input type="checkbox"/> Cattle | <input type="checkbox"/> Chickens | <input type="checkbox"/> Cats        | <input type="checkbox"/> Rabbits      |

11. Do you drink fresh milk?  Yes  No    If yes, what type?  Cow  Goat

12. Have you been around animals giving birth (live or dead)?  Yes  No

13. Have you seen rodents around your house?  Most days  Sometimes  Never

14. Have you been bitten by a tick before?  Yes  No

**Health**

15. How many times have you had malaria or fever this year? \_\_\_\_\_

16. Have you ever been admitted to the hospital?  Yes  No    What was diagnosis? \_\_\_\_\_

17. Do you have any problems with hearing?  Yes  No

18. Do you sleep under a mosquito net?  Yes  No

Person Completing Form      Name: \_\_\_\_\_      Initials \_\_\_\_\_

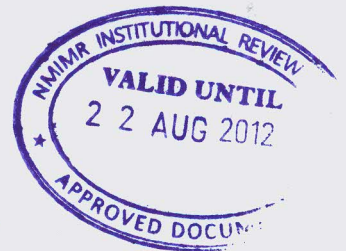

**\*If lab specimen is collected, complete the following information and send a copy of this form to the lab with the specimen.**

19. Date of specimen collection: \_\_\_/\_\_\_/\_\_\_

**For the Laboratory Use Only**

20. Date specimen received by lab: \_\_\_/\_\_\_/\_\_\_      21. Specimen Condition: Adequate Not adequate \_\_\_\_\_  
(Reason)

22. Results: Check (X) below as appropriate:

| Disease/<br>Condition | Type of<br>antibody | Results (+=positive)<br>(-=negative)                  | Titer (if done) | Type of test<br>(e.g. ELISA) |
|-----------------------|---------------------|-------------------------------------------------------|-----------------|------------------------------|
| Lassa                 | IgG                 | <input type="checkbox"/> + <input type="checkbox"/> - | _____           |                              |
| Leptospirosis         | IgG                 | <input type="checkbox"/> + <input type="checkbox"/> - | _____           |                              |
| Melioidosis           | IgG                 | <input type="checkbox"/> + <input type="checkbox"/> - | _____           |                              |
| Brucellosis           | IgG                 | <input type="checkbox"/> + <input type="checkbox"/> - | _____           |                              |
| Q Fever               | IgG                 | <input type="checkbox"/> + <input type="checkbox"/> - | _____           |                              |

COMMENTS:

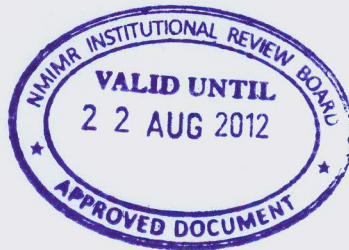

Supplement: pone.0215224.s001.pdf [file pone.0215224.s001.pdf]
